# Supplementary material for: Keeping Food on the Table: Human Responses and Changing Coastal Fisheries in Solomon Islands
Source: PLoS One. 2015 Jul 9;10(7):e0130800. doi: 10.1371/journal.pone.0130800 (PMC4497618; doi:10.1371/journal.pone.0130800)
Supplement: S1 Table — (DOCX) [file pone.0130800.s002.docx]

**S1 Table 1. Statistical results of Kruskal-Wallis analysis by fishing method.**

| **Fishing Method** | **Parameter** | **Statistics** |
| --- | --- | --- |
| Dropline | Mean fishing time | KW(1,79) = 26.24 p < 0.001 |
| Mean distance travelled | KW(1,79) = 7.46 p = 0.006 |
| Mean catch weight | KW(1,79) = 13.55 p < 0.001 |
| Mean fish size | KW(1,79) = 3.52 p = 0.06 |
| CPUE | KW(1,79) = 1.37 p = 0.24 |
| Handline | Mean fishing time | KW(1,662) = 203.73 p < 0.001 |
| Mean distance travelled | KW(1,662) = 38.36 p < 0.001 |
| Mean catch weight | KW(1,662) = 40.63 p < 0.001 |
| Mean fish size | KW(1,641) = 46.67 p < 0.001 |
| CPUE | KW(1,662) = 30.89 p < 0.001 |
| Net | Mean fishing time | KW(1,101) = 22.51 p < 0.001 |
| Mean distance travelled | KW(1,101) = 0.22 p = 0.63 |
| Mean catch weight | KW(1,101) = 8.64 p = 0.003 |
| Mean fish size | KW(1,80) = 0.01 p = 0.93 |
| CPUE | KW(1,101) = 0.58 p < 0.46 |
| Trolling | Mean fishing time | KW(1,146) = 59.43 p < 0.001 |
| Mean distance travelled | KW(1,146) = 50.52 p < 0.001 |
| Mean catch weight | KW(1,146) = 11.16 p < 0.001 |
| Mean fish size | KW(1,145) = 6.98 p = 0.008 |
| CPUE | KW(1,146) = 5.83 p = 0.015 |
